# Supplementary material for: FTO Genotype and Type 2 Diabetes Mellitus: Spatial Analysis and Meta-Analysis of 62 Case-Control Studies from Different Regions
Source: MDPI journal article supplement (doi:10.3390/genes8020070), 2017-02-11
Supplement: s1 [file s1]

# FTO genotype and type 2 diabetes mellitus: spatial analysis and meta-analysis of 62 case-control studies from different regions

Ying Yang <sup>1,†</sup>, Boyang Liu <sup>2,†</sup>, Wei Xia <sup>3,†</sup>, Jing Yan <sup>4</sup>, Huan-Yu Liu <sup>5</sup>, Ling Hu <sup>6</sup>, Song-Mei Liu <sup>1,\*</sup>

<sup>1</sup> Center for Gene Diagnosis, Zhongnan Hospital of Wuhan University, Donghu Road 169#, Wuhan 430071, China; yangying0109@whu.edu.cn

<sup>2</sup> Department of Geography, Wilkeson Hall, State University of New York at Buffalo, Buffalo, NY 14261, USA; bliu24@buffalo.edu

<sup>3</sup> Department of Clinical Laboratory, Wuhan Children's Hospital (Wuhan Maternal and Child Healthcare Hospital), Tongji Medical College, Huazhong University of Science & Technology, Wuhan 430016, China; 18971319110@163.com

<sup>4</sup> Hubei Meteorological Information and Technology Support Center, Wuhan 430074, China; yanjing619@hotmail.com

<sup>5</sup> Department of Clinical Medicine, Hubei University of Medicine, Hubei 442000, China; gutentag95@sina.com

<sup>6</sup> Department of Neurology, Wuhan Children's Hospital (Wuhan Maternal and Child Healthcare Hospital), Tongji Medical College, Huazhong University of Science & Technology, Wuhan 430016, China; m18372622675@163.com

\* Correspondence: smliu@whu.edu.cn; Tel./Fax: +86-27-6781-2610

† These authors contributed equally to this work.

**Table S1.** Publication bias of *FTO* SNPs.

| SNP        | Without BMI adjustment |         | With BMI adjustment |         |
|------------|------------------------|---------|---------------------|---------|
|            | $p_B^a$                | $p_E^b$ | $p_B^a$             | $p_E^b$ |
| rs9939609  | 0.940                  | 0.484   | 0.418               | 0.109   |
| rs8050136  | 0.159                  | 0.469   | 0.280               | 0.515   |
| rs1421085  | 0.174                  | 0.114   | 0.174               | 0.152   |
| rs17817499 | 0.117                  | 0.612   | 0.602               | 0.920   |

<sup>a</sup>  $p$  value for Begg's test; <sup>b</sup>  $p$  value for Egger's test.

**Table S2.** Heterogeneity for rs9939609 in South Asia and North America subgroups after excluding each study.

| Excluded study         | Subgroup   | Heterogeneity             |          |
|------------------------|------------|---------------------------|----------|
|                        |            | <i>I</i> <sup>2</sup> (%) | <i>P</i> |
| Without BMI adjustment |            |                           |          |
| Phani                  | South Asia | 63.0                      | 0.006    |
| Fawwad                 | South Asia | 34.6                      | 0.141    |
| Raza                   | South Asia | 63.2                      | 0.005    |
| Bazzi                  | South Asia | 60.9                      | 0.009    |
| Ali                    | South Asia | 57.7                      | 0.015    |
| Rees (COBRA)           | South Asia | 62.9                      | 0.006    |
| Rees (UKADS/DGP)       | South Asia | 63.2                      | 0.005    |

|                                    |                      |             |              |
|------------------------------------|----------------------|-------------|--------------|
| <b>Chauhan</b>                     | <b>South Asia</b>    | <b>37.2</b> | <b>0.121</b> |
| Yajnik                             | South Asia           | 58.9        | 0.013        |
| Sanghera                           | South Asia           | 62.3        | 0.007        |
| Cruz                               | North America        | 91.4        | 0.001        |
| <b>Bressler(African-Americans)</b> | <b>North America</b> | <b>0.0</b>  | <b>0.667</b> |
| Bressler(White)                    | North America        | 82.2        | 0.018        |

---

| With BMI adjustment |                   |             |              |
|---------------------|-------------------|-------------|--------------|
| <b>Ali</b>          | <b>South Asia</b> | <b>20.3</b> | <b>0.288</b> |
| Rees (COBRA)        | South Asia        | 77.1        | 0.004        |
| Rees (UKADS/DGP)    | South Asia        | 77.3        | 0.004        |
| Chauhan             | South Asia        | 54.0        | 0.089        |
| Yajnik              | South Asia        | 75.3        | 0.007        |

Studies in red text represent the heterogeneity disappeared after removing this study.

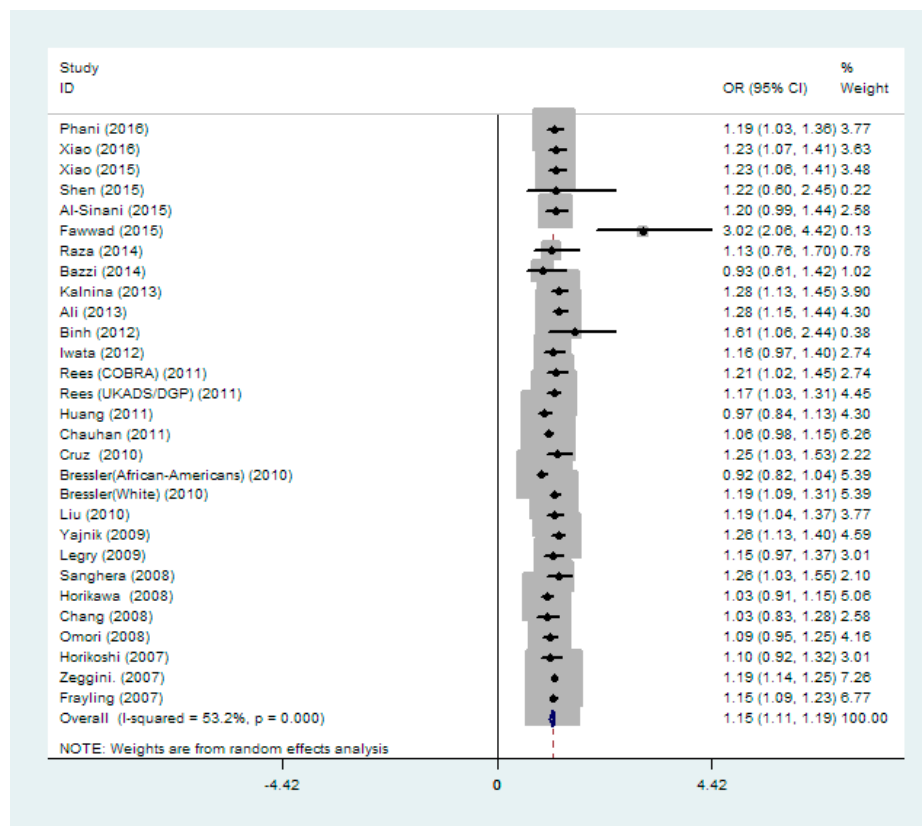

(a)

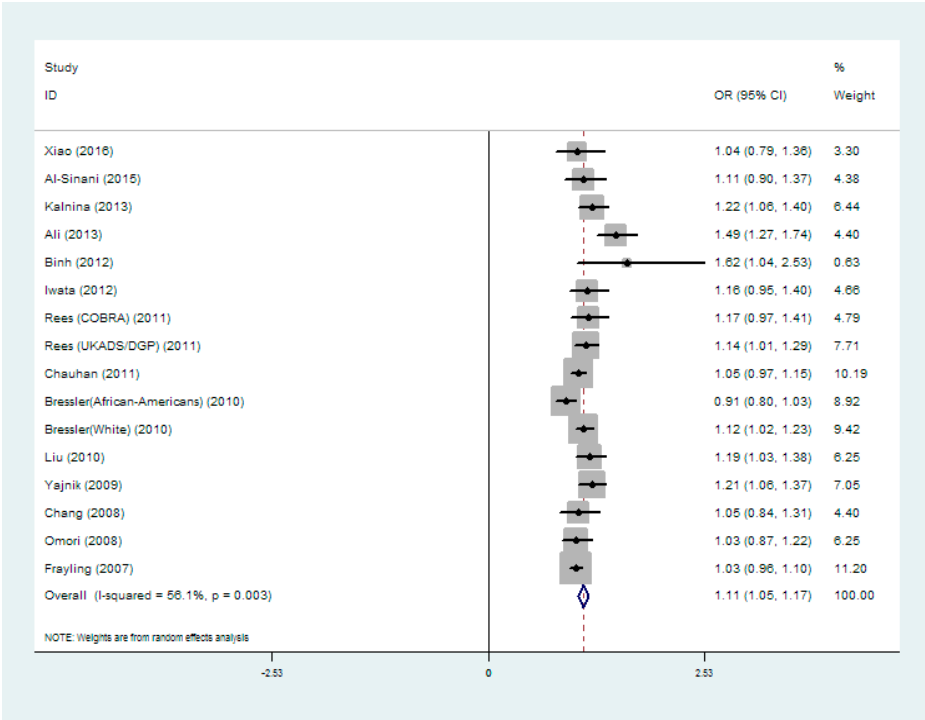

(b)

**Figure S1.** Meta-analysis for the associations between rs9939609 and T2DM risk (a) without and (b) with adjustment for body mass index (BMI).

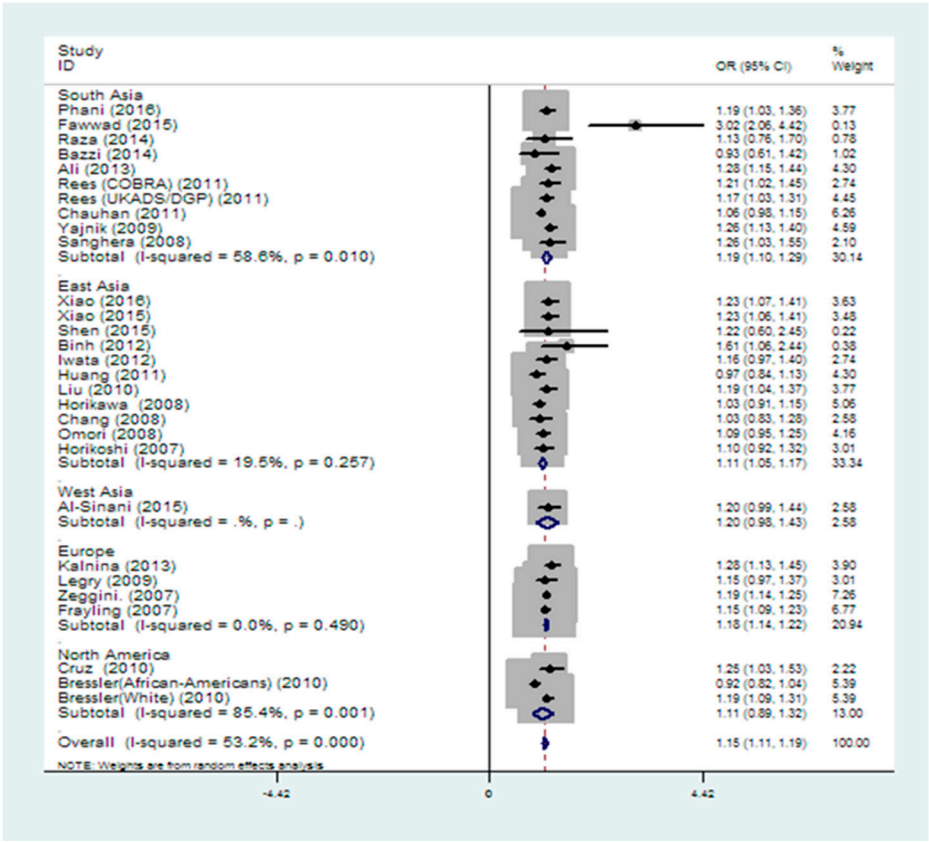

(a)

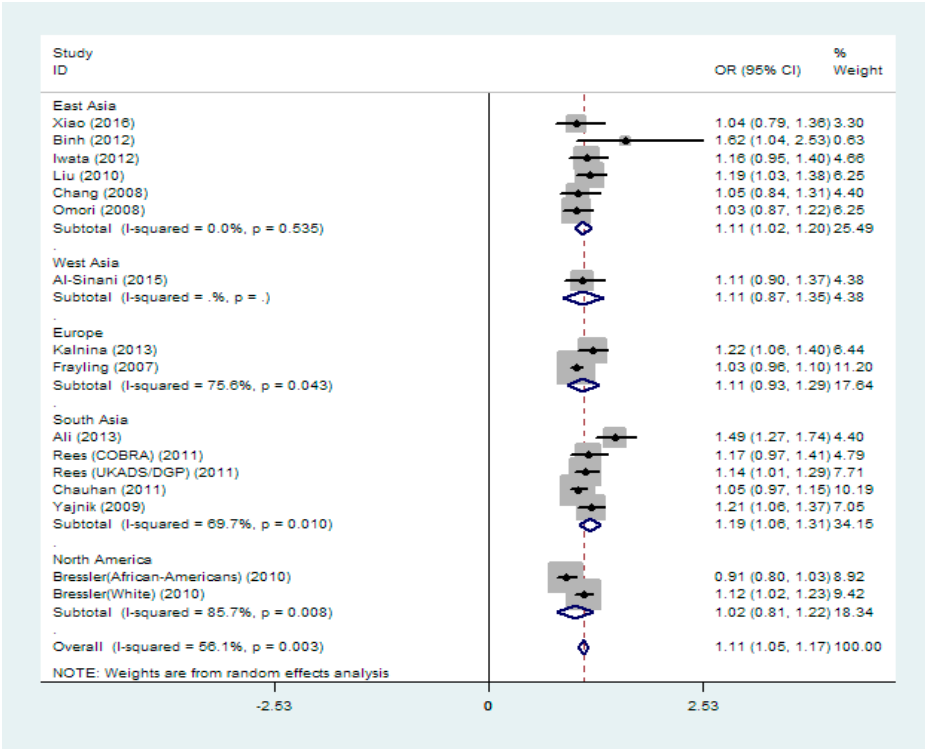

(b)

**Figure S2.** The stratified analysis results of rs9939609 grouped by region (a) without and (b) with adjustment for body mass index (BMI).

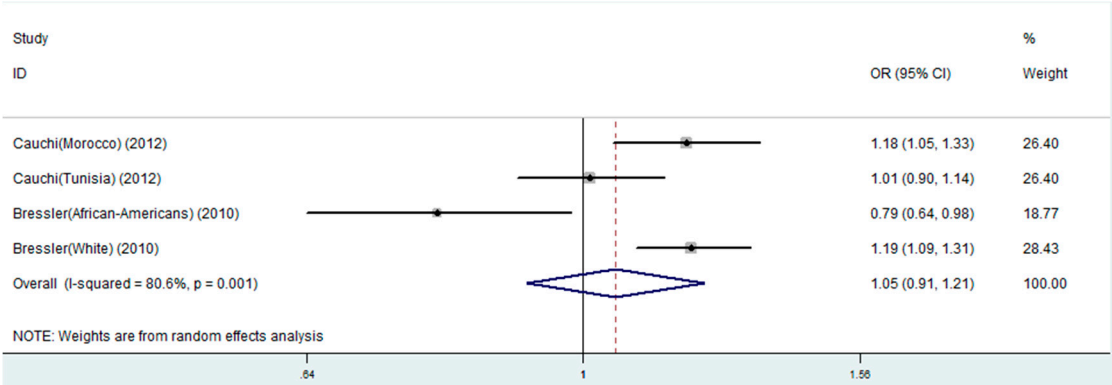

(a)

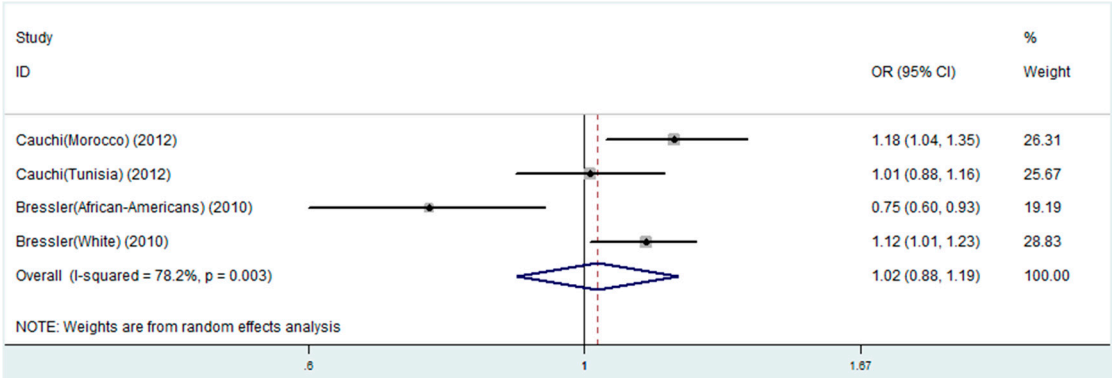

(b)

**Figure S3.** Meta-analysis for the associations between rs1421085 and T2DM risk (a) without and (b) with adjustment for body mass index (BMI).

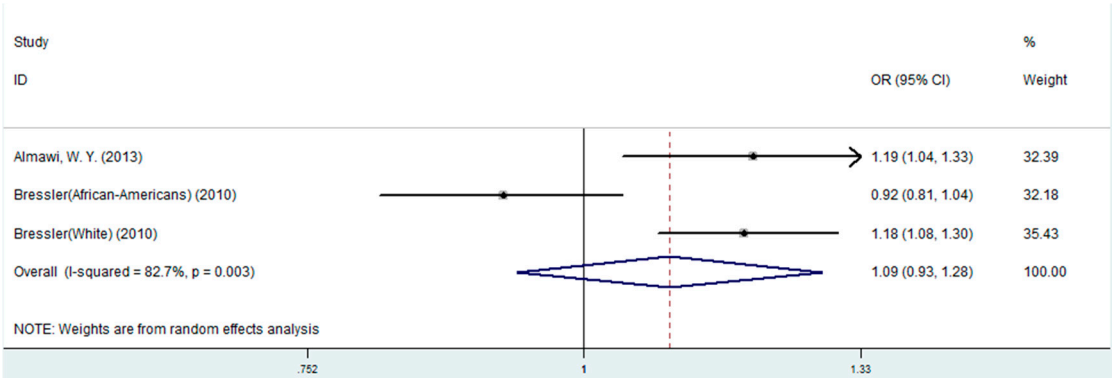

(a)

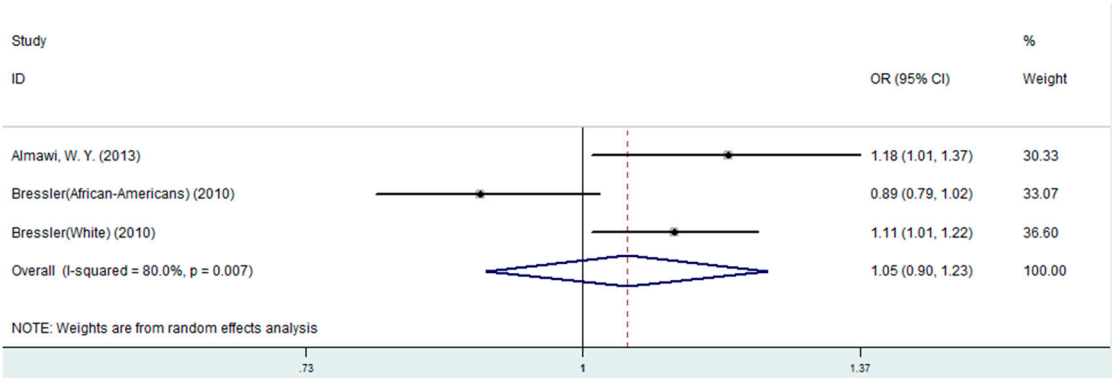

(b)

**Figure S4.** Meta-analysis for the associations between rs17817499 and T2DM risk (a) without and (b) with adjustment for body mass index (BMI).

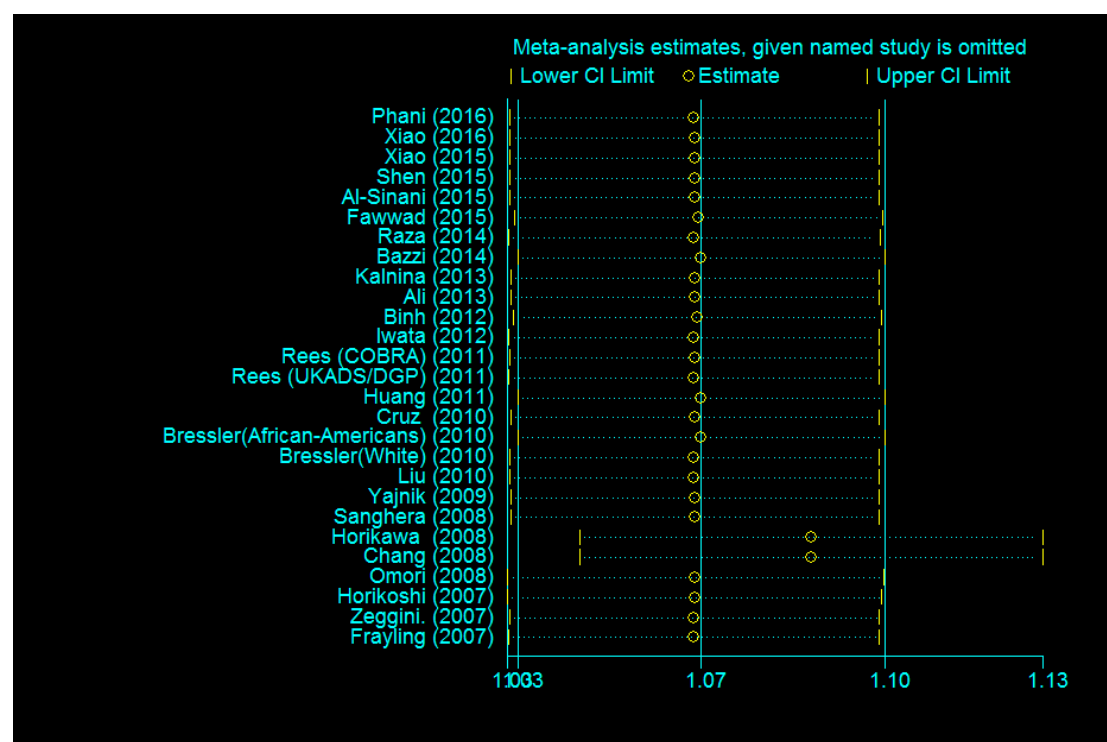

**Figure S5.** Sensitivity analysis of rs9939609 by excluding studies with an unknown Hardy-Weinberg equilibrium (HWE) in controls [1,2].

## References

1. Phani, N.M.; Vohra, M.; Rajesh, S.; Adhikari, P.; Nagri, S.K.; D'Souza, S.C.; Satyamoorthy, K.; Rai, P.S. Implications of critical *PPAR* $\gamma$ 2, *ADIPOQ* and *FTO* gene polymorphisms in type 2 diabetes and obesity-mediated susceptibility to type 2 diabetes in an Indian population. *Mol. Genet. Genomics* **2016**, *291*, 193–204.
2. Raza, S.T.; Abbas, S.; Ahmad, A.; Ahmed, F.; Zaidi, Z.H.; Mahdi, F. Association of glutathione-s-transferase (GSTM1 and GSTT1) and *FTO* gene polymorphisms with type 2 diabetes mellitus cases in Northern India. *Balk. J. Med. Genet.* **2014**, *17*, 47–54.

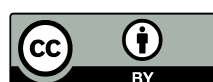

© 2017 by the authors; licensee MDPI, Basel, Switzerland. This article is an open access article distributed under the terms and conditions of the Creative Commons Attribution (CC BY) license (<http://creativecommons.org/licenses/by/4.0/>).
